# Supplementary material
Source: Springer Nature journal article supplement (https://www.springermedizin.de/resource/supplementary/12904_2014_245_MOESM1_ESM.pdf/9517808)
Supplement: MOESM1 [file 9517808]

|                                    |
|------------------------------------|
| Coding List of Independent Readers |
|------------------------------------|

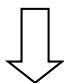

|                    |
|--------------------|
| Initial Theme List |
|--------------------|

- |                                  |
|----------------------------------|
| 1) Motivated patients            |
| 2) Positive experiences          |
| 3) Recent experiences            |
| 4) Active participant            |
| 5) Ambiguous                     |
| 6) Help others                   |
| 7) New treatment options         |
| 8) Perseverance                  |
| 9) Religion                      |
| 10) Trust                        |
| 11) Valued                       |
| 12) Access                       |
| 13) Communication                |
| 15) Comprehensive care           |
| 16) Confidence in job            |
| 17) Coordination in care         |
| 18) Feel supported               |
| 19) Knowledgeable providers      |
| 20) No perceived relationship    |
| 21) Pain management              |
| 22) People care                  |
| 23) Quality care                 |
| 24) Respect of services          |
| 25) Support in challenging times |

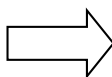

|                    |
|--------------------|
| Interim Theme List |
|--------------------|

- |                               |
|-------------------------------|
| 1) Helping others             |
| 2) Perseverance               |
| 3) Spirituality               |
| 4) Access                     |
| 5) Communication              |
| 6) Comprehensive care         |
| 7) Coordination of care       |
| 8) Feel supported             |
| 9) Confidence in providers    |
| 10) No perceived relationship |
| 11) Pain management           |
| 12) Quality care              |

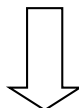

|                  |
|------------------|
| Final Theme List |
|------------------|

- |                                                                                   |
|-----------------------------------------------------------------------------------|
| 1) Past experiences with care                                                     |
| 2) Self-identified personal characteristics and reasons for participation         |
| 3) Quality of the cancer clinical trial team and palliative care team partnership |
